# Supplementary material
Source: MDPI journal article supplement (https://www.mdpi.com/1424-8247/17/5/629)
Supplement: s1 [file s1]

# A preliminary investigation of radiation-sensitive ultrasound contrast agents for photon dosimetry

Bram Carlier\*, Sophie V. Heymans\*, Sjoerd Nooijens, Gonzalo Collado-Lara, Yosra Toumia, Laurence Delombaerde, Gaio Paradossi, Jan D'hooge, Koen Van Den Abeele, Edmond Sterpin, Uwe Himmelreich

## Supplementary material

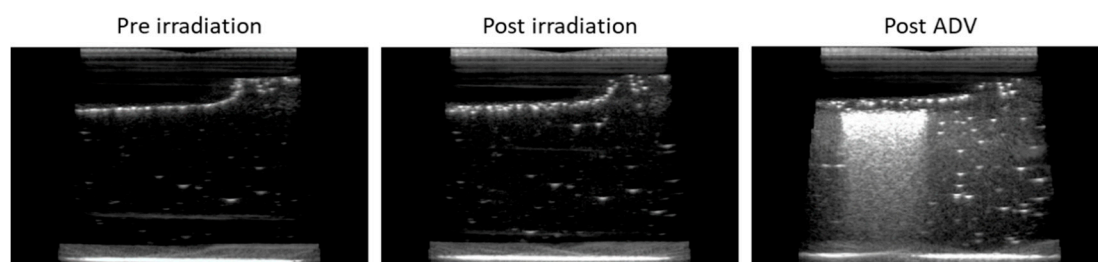

**Figure S1.** Ultrasound contrast generation of PVA-PFB nanodroplets after a radiation and acoustic stimulus. Gelatine phantom containing 25  $\mu\text{M}$  of PVA-PFB nanodroplets before (left) and after (middle) irradiation with 10 Gy photons at 2 Gy/min, and after subsequent acoustic droplet vaporization (ADV, right).

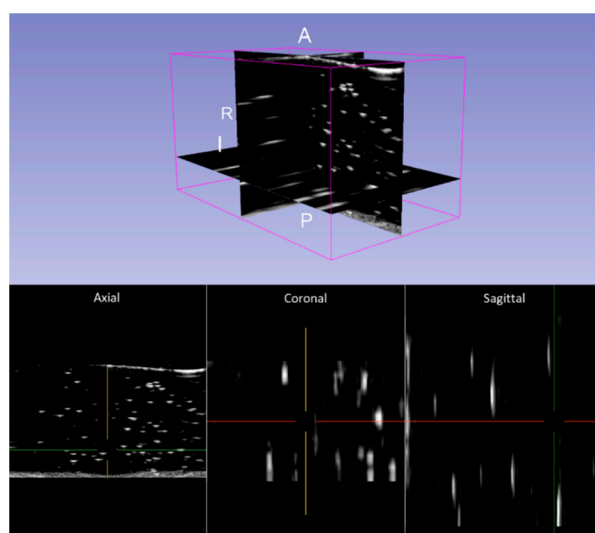

**Figure S2.** Offline stacking of 2D ultrasound images into a 3D dataset using ImageJ and 3D slicer.
